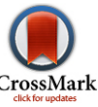

## Correction

# Correction: The Diagnostic Accuracy of Ultrasonography versus Endoscopy for Primary Nasopharyngeal Carcinoma

The PLOS ONE Staff

## Notice of Republication

This article was republished on May 16, 2014 to include figures that were removed during the typesetting process. Please download this article again to view the correct version. The originally published, uncorrected article and the republished, corrected article are provided here for reference.

## Supporting Information

**File S1.** Originally published, uncorrected article.  
(PDF)

**File S2.** Republished corrected article.  
(PDF)

## Reference

1. Gao Y, Liu J-J, Zhu S-Y, Yi X (2014) The Diagnostic Accuracy of Ultrasonography versus Endoscopy for Primary Nasopharyngeal Carcinoma. PLoS ONE 9(3): e90412. doi:10.1371/journal.pone.0090412

**Citation:** The PLOS ONE Staff (2014) Correction: The Diagnostic Accuracy of Ultrasonography versus Endoscopy for Primary Nasopharyngeal Carcinoma. PLoS ONE 9(6): e99679. doi:10.1371/journal.pone.0099679

**Published:** June 2, 2014

**Copyright:** © 2014 The PLOS ONE Staff. This is an open-access article distributed under the terms of the Creative Commons Attribution License, which permits unrestricted use, distribution, and reproduction in any medium, provided the original author and source are credited.
